# Supplementary material
Source: MDPI journal article supplement (https://www.mdpi.com/2673-4125/3/4/45)
Supplement: s1 [file s1]

Archive with 2 entries (2 files):
- Supplement 1.pdf
- Supplement 2,3.pdf
